# Supplementary material for: Regulation of RNA Interference Pathways in the Insect Vector Laodelphax striatellus by Viral Proteins of Rice Stripe Virus
Source: MDPI journal article supplement (doi:10.3390/v13081591), 2021-08-11
Supplement: s1 [file s1]

Table S1. Primers used in this study

| Primer name       | Primer sequence (5' to 3')                |
|-------------------|-------------------------------------------|
| GFP-RNAi-F        | CACAAGTTCAGCGTGTCCG                       |
| GFP-RNAi-R        | GTTACCTTGATGCCGTTT                        |
| GFP-RNAi-T7F      | TAATACGACTCACTATAGGCACAAGTTCAGCGTGTCCG    |
| GFP-RNAi-T7R      | TAATACGACTCACTATAGGGTTACCTTGATGCCGTTT     |
| NS2-F             | ATGGCATTACTCCTTTTCAATGA                   |
| NS2-R             | TCACATTAGAATAGGACACTC                     |
| NS2-RNAi-F        | TGAAGCTGATCTTGTTGCCCA                     |
| NS2-RNAi-R        | ACTCATGTGCTCCGACCAAG                      |
| NS2-RNAi-T7F      | TAATACGACTCACTATAGGTGAAGCTGATCTTGTTGCCCA  |
| NS2-RNAi-T7R      | TAATACGACTCACTATAGGACTCATGTGCTCCGACCAAG   |
| NS2-qPCR-F        | GCTCTCGCCATAGCAACTGA                      |
| NS2-qPCR-R        | AGCAAAGTGAACCCGTTGAC                      |
| AGO1-RNAi-F       | TGCCAATTATCGGCCAACCT                      |
| AGO1-RNAi-R       | CCCAGGAATATCACCGGCTC                      |
| AGO1-RNAi-T7F     | TAATACGACTCACTATAGGTGCCAATTATCGGCCAACCT   |
| AGO1-RNAi-T7R     | TAATACGACTCACTATAGGCCAGGAATATCACCGGCTC    |
| AGO1-qPCR-F       | GGCCTCACCATCTCCAACAA                      |
| AGO1-qPCR-R       | CTCGACGCCAGTGAAGAAGT                      |
| AGO2-RNAi-F       | AACCGCAAAGTCACTCCGAT                      |
| AGO2-RNAi-R       | GCGAATCTGTCCGATACCGT                      |
| AGO2-RNAi-T7F     | TAATACGACTCACTATAGGAACCGCAAAGTCACTCCGAT   |
| AGO2-RNAi-T7R     | TAATACGACTCACTATAGGGCGAATCTGTCCGATACCGT   |
| AGO2-qPCR-F       | TAAACCGGACAAGCCTCGAC                      |
| AGO2-qPCR-R       | CTGCCGTTCTGTGTTGAAAA                      |
| Translin-F        | ATGGATTTAGATTTTAAATCG                     |
| Translin-R        | CTAACTCTTATTCTCCGTTG                      |
| Translin-RNAi-F   | TGCTCGAAGGCTCGTGAA                        |
| Translin-RNAi-R   | ATTCTCCGTTGAAGTCAAGTGT                    |
| Translin-RNAi-T7F | TAATACGACTCACTATAGGTGCTCGAAGGCTCGTGAA     |
| Translin-RNAi-T7R | TAATACGACTCACTATAGGATTCTCCGTTGAAGTCAAGTGT |
| Translin-qPCR-F   | TGAAGAATGATGACGAGCGTTT                    |
| Translin-qPCR-R   | TCACGAGCCTTCGAGCAATA                      |
| Drosha- qPCR -F   | CGGTAGCAGTAGTAGCAATTCA                    |
| Drosha- qPCR -R   | TTCTCGCCAGCATAGATGTTAT                    |
| Pasha-qPCR-F      | CGTAGTGGAATGCCTCTC                        |
| Pasha-qPCR-R      | GTGCCTTCTTCTGCTCTT                        |
| Trax-qPCR-F       | CGGACGATATTGTTGAGGACTC                    |
| Trax-qPCR-R       | TTGAGGCATCAGTGGAGACC                      |
| RdRp2-EcoRI-F     | TCGCGGATCCGAATTCGAGGCTGTTGATGTAAAGAC      |
| RdRp2-XhoI-R      | GGTGGTGGTGTCTCGAGTCATGATTCTGGACTGCCTATC   |

---

|                 |                                    |
|-----------------|------------------------------------|
| Translin-NcoI-F | AGGAGATATACCATGGGCATGGATTTAGATTTT  |
| Translin-XhoI-R | GGTGGTGGTGCTCGAGACTCTTATTCTCC      |
| NS2-NcoI-F      | AGGAGATATACCATGGGCATGGCATTACTCCT   |
| NS2-XhoI-R      | GGTGGTGGTGCTCGAGCATTAGAATAGGACACTC |

---
